# Supplementary material for: Inclisiran for the Treatment of Heterozygous Familial Hypercholesterolemia
Source: Atypon-hosted journal article supplement (doi:10.1056/nejmoa1913805), 2020-03-18
Supplement: nejmoa1913805_appendix.pdf [file nejmoa1913805_appendix.pdf]

## Supplementary Appendix

This appendix has been provided by the authors to give readers additional information about their work.

Supplement to: Raal FJ, Kallend D, Ray KK, et al. Inclisiran for the treatment of heterozygous familial hypercholesterolemia. *N Engl J Med* 2020;382:1520-30. DOI: 10.1056/NEJMoa1913805

## Supplementary Appendix

This appendix has been provided by the authors to give readers additional information about their work.

Supplement to: Frederick J Raal MD PhD; David Kallend MBBS; Kausik K Ray MD MPhil; Traci Turner MD; Wolfgang Koenig MD; R. Scott Wright MD; Peter LJ Wijngaard PhD; Danielle Curcio MBA; Mark J Jaros PhD; Lawrence A Leiter MD and John JP Kastelein MD PhD for the ORION-9 Investigators\*

\* The ORION-9 investigators are listed in the supplementary appendix

From the Faculty of Health Sciences, University of the Witwatersrand, Johannesburg, South Africa (FJR); The Medicines Company, Zurich, Switzerland (DGK), Imperial Centre for Cardiovascular Disease Prevention, Department of Primary Care and Public Health, Imperial College, London, UK (KKR); Medpace Reference Laboratories, Cincinnati, Ohio (TT); Deutsches Herzzentrum München, Technische Universität München and DZHK (German Centre for Cardiovascular Research), partner site Munich Heart Alliance, Munich, Germany and Institute of Epidemiology and Medical Biometry, University of Ulm, Ulm, Germany (WK); Division of Preventive Cardiology and the Department of Cardiology, Mayo Clinic, Rochester, MN (RSW); The Medicines Company, Parsippany, NJ (PLJW, DC); Summit Analytical, CO (MJ); Li Ka Shing Knowledge Institute, St. Michael's Hospital, University of Toronto, Toronto, Canada (LAL); Department of Vascular Medicine, Academic Medical Center, University of Amsterdam, Amsterdam, Netherlands (JJPK)

## **Supplementary Appendix**

### **Inclisiran for familial hypercholesterolemia- results of the ORION-9 trial**

Frederick J Raal MD PhD; David Kallend MBBS; Kausik K Ray MD MPhil; Traci Turner MD; Wolfgang Koenig MD; R. Scott Wright MD; Peter LJ Wijngaard PhD; Danielle Curcio MBA; Mark J Jaros PhD; Lawrence A Leiter MD; John JP Kastelein MD PhD for the ORION-9 Investigators\*

## Supplementary Appendix Table of Contents

|                                                           |    |
|-----------------------------------------------------------|----|
| 1. Study Oversight .....                                  | 4  |
| 1.1 Executive Committee.....                              | 4  |
| 1.2 Independent Data Monitoring Committee.....            | 4  |
| 2. List of Investigators and Study Sites .....            | 5  |
| 3. Trial Registration.....                                | 6  |
| 4. Study Methods.....                                     | 7  |
| 4.1 Inclusion Criteria.....                               | 7  |
| 4.2 Exclusion Criteria.....                               | 7  |
| 4.3 Appendix A.....                                       | 9  |
| 4.4 Appendix B.....                                       | 10 |
| 4.5 Background lipid lowering treatment exceptions.....   | 10 |
| 4.6 Baseline Statin Dose Categories.....                  | 11 |
| 4.7 Endpoints of the study and Randomization Strata ..... | 11 |
| 4.8 Clinical End Point Adjudication .....                 | 12 |
| 4.9 Laboratory Analytical Methods.....                    | 12 |
| 4.10 Genetic analysis.....                                | 14 |
| 4.11 Sample Size .....                                    | 15 |
| 4.12 Statistical Analyses – Efficacy End Points .....     | 16 |
| 5. Supplementary Figures .....                            | 17 |
| 6. Supplementary Tables .....                             | 23 |

## 1. Study Oversight

ORION-9 was designed by the sponsor, The Medicines Company, and overseen by an executive committee and an independent data monitoring committee. The executive committee acted as the academic steering group overseeing trial conduct.

The independent Data Monitoring Committee (DMC) reviewed unblinded safety data beginning after the first 40 subjects received the first injection of inclisiran or placebo and completed the day 30 day follow-up visit. Thereafter the DMC reviewed safety data every 3 months until end of study.

The Institutional review boards at each participating site approved the study protocol and each patient provided written informed consent.

### 1.1 Executive Committee

| Member                                          | Affiliation                                                    |
|-------------------------------------------------|----------------------------------------------------------------|
| Frederick J Raal, M.D. (Principal investigator) | University of the Witwatersrand, South Africa                  |
| Kausik K. Ray, M.D., M.Phil.                    | Imperial College London, London, UK                            |
| Wolfgang Koenig                                 | Deutsches Herzzentrum München, Germany                         |
| Lawrence A. Leiter, M.D.                        | St. Michael's Hospital, University of Toronto, Toronto, Canada |
| John JP Kastelein, M.D, PhD                     | Academic Medical Center, University of Amsterdam, Amsterdam    |
| Scott Wright, M.D.                              | Mayo Clinic, Rochester, Minnesota, USA                         |
| Peter LJ Wijngaard, PhD                         | The Medicines Company, Parsippany, USA                         |
| David G Kallend, MBBS                           | The Medicines Company, Zurich, Switzerland                     |

### 1.2 Independent Data Monitoring Committee

| Name/Credentials               | Address                                        |
|--------------------------------|------------------------------------------------|
| David Waters, M.D. (Chair)     | UCSF, San Francisco, USA                       |
| Terje Pedersen, M.D.           | Ullevål University Hospital, Oslo, Norway      |
| Eva Lonn, M.D, MSc, FRCP, FACC | McMaster University, Hamilton, Ontario, Canada |
| Ian Ford                       | University of Glasgow, Glasgow, UK             |

## 2. List of Investigators and Study Sites

| Investigator Name          | Institution                                                               |
|----------------------------|---------------------------------------------------------------------------|
| <b>USA:</b>                |                                                                           |
| John Homan                 | John Homan, MD                                                            |
| Traci Turner               | Metabolic and Atherosclerosis Research Center                             |
| Linda Hemphill             | Massachusetts General Hospital                                            |
| Chad Wadell                | St Joseph Heritage Healthcare                                             |
| John Pullman               | Mercury Street Medical Group                                              |
| Robert Fishberg            | Overlook Medical Center                                                   |
| Joshua Knowles             | The Stanford Center for Clinical and Translational Education and Research |
| Seth Baum                  | Excel Medical Clinical Trials LLC                                         |
| Leslie Forgosh             | Health East Medical Research Institute                                    |
| Anthony Captain            | Global Research Partners and Consultants Inc                              |
| Atoya Adams                | AB Clinical Trials                                                        |
| <b>CANADA:</b>             |                                                                           |
| Alexis Baass               | Clinical Research Institute of Montreal                                   |
| Robert Dufour              | Clinical Research Institute of Montreal                                   |
| Jean Bergeron              | Clinique des Maladies Lipidiques de Quebec, Inc.                          |
| Daniel Gaudet              | ECOGENE-21                                                                |
| <b>SOUTH AFRICA:</b>       |                                                                           |
| Lesley Burgess             | Synexus Affiliate - Tread Research Cc                                     |
| Nyda Fourie                | Synexus Affiliate - Iatros International                                  |
| Soritha Coetzer            | Synexus - Helderberg Clinical Research Centre                             |
| Mark Abelson               | Vergelegen Medi-Clinic                                                    |
| Elane Van Nieuwenhuizen    | Synexus - Watermeyer Clinical Research Centre                             |
| Iftikhar Ebrahim           | Unitas Hospital                                                           |
| Maria Pretorius            | Synexus Affiliate - Tiervlei Trial Centre                                 |
| Dirkie Jansen van Rensburg | Parkmed Medical Center                                                    |
| Frederick Raal             | Johannesburg Hospital                                                     |
| <b>NETHERLANDS:</b>        |                                                                           |
| Gerben Mol                 | Meander Medisch Centrum                                                   |
| Eric Stroes                | Academisch Medisch Centrum Amsterdam                                      |
| Gerard Hovingh             | Academisch Medisch Centrum Amsterdam                                      |
| Frank Visseren             | Universitait Medisch Centrum Utrecht                                      |

|                            |                                             |
|----------------------------|---------------------------------------------|
| Henricus van Kesteren      | Admiraal de Ruyter Ziekenhuis               |
| Paul van Bergen            | Vasculair Onderzoek Centrum Hoorn           |
| <b>SPAIN:</b>              |                                             |
| Luis Masana                | Hospital Universitari Sant Joan de Reus     |
| Fernando Civeira Murillo   | Hospital Universitario Miguel Servet        |
| Jose Luis Diaz Diaz        | Hospital Abente y Lago                      |
| Francisco Fuentes Jimenez  | C.H. Regional Reina Sofia                   |
| Daniel Zambon Rados        | Hospital Clinic de Barcelona                |
| Xavier Pinto Sala          | Hospital Universitario de Bellvitge         |
| <b>DENMARK:</b>            |                                             |
| Erik Schmidt               | Aalborg Universitetshospital                |
| Lars Juel Andersen         | Sjællands Universitets hospital, Roskilde   |
| Pernille Corell            | Sjællands Universitets hospital, Roskilde   |
| Morten Bottcher            | Regionshospitalet Herning                   |
| Kristian Korsgaard Thomsen | Sydvestjysk Sygehus Esbjerg                 |
| Ib Christian Klausen       | Regionhospitalet Viborg                     |
| Jens Dahlgard Hove         | Hvidovre Hospital                           |
| <b>SWEDEN:</b>             |                                             |
| Åke Olsson                 | Akardo AB                                   |
| Stefano Romeo              | Sahlgrenska Universitetssjukhuset           |
| Mats Eriksson              | Karolinska Universitetssjukhuset Huddinge   |
| <b>CZECH REPUBLIC:</b>     |                                             |
| Vera Adamkova              | Institut klinicke a experimentalni mediciny |
| Lucie Solcova              | Nemocnice Trutnov                           |
| Jan Zeman                  | Nemocnice Na Bulovce                        |
|                            |                                             |

### 3. Trial Registration

Registration for study MDCO-PCS-17-03 was submitted to ClinicalTrials.gov on 11 Jan 2018.

- The first patient was screened on 28<sup>th</sup> November, and was randomized on 12<sup>th</sup> December 2017.

## **4. Study Methods**

### **4.1 Inclusion Criteria**

Subjects may be included if they meet all of the following inclusion criteria prior to randomization:

1. Male or female subjects  $\geq 18$  years of age.
2. History of HeFH with a diagnosis of HeFH by genetic testing; and/or a documented history of untreated LDL-C of  $>190$  mg/dL, and a family history of FH, elevated cholesterol or early heart disease that may indicate FH (APPENDIX A)
3. Stable on a low-fat diet (e.g. NCEP)
4. Serum LDL-C  $\geq 2.6$  mmol/L ( $\geq 100$  mg/dL) at screening
5. Fasting triglyceride  $<4.52$  mmol/L ( $<400$  mg/dL) at screening.
6. Calculated glomerular filtration rate  $>30$  mL/min by estimated glomerular filtration rate (eGFR) using standardized local clinical methodology.
7. Subjects on statins should be receiving a maximally tolerated dose. Maximum tolerated dose is defined as the maximum dose of statin that can be taken on a regular basis without intolerable adverse events. Intolerance to any dose of any statin must be documented as historical AEs attributed to the statin in question in the source documentation and on the Medical History page of the electronic case report form (eCRF) (APPENDIX B).
8. Subjects not receiving statins must have documented evidence of intolerance to all doses of at least two different statins (APPENDIX B).
9. Subjects on lipid-lower therapies (such as a statin and/or ezetimibe) should be on a stable dose for  $\geq 30$  days before screening with no planned medication or dose change during study participation.
10. Subjects must be willing and able to give informed consent before initiation of any study related procedures and willing to comply with all required study procedures.

### **4.2 Exclusion Criteria**

1. Any uncontrolled or serious disease, or any medical or surgical condition, that may either interfere with participation in the clinical study, and/or put the subject at significant risk (according to investigator's [or delegate] judgment) if he/she participates in the clinical study.
2. An underlying known disease or surgical, physical, or medical condition that, in the opinion of the investigator (or delegate) might interfere with interpretation of the clinical study results.
3. New York Heart Association (NYHA) class IV heart failure or last known left ventricular ejection fraction  $<25\%$ .
4. Cardiac arrhythmia within 3 months prior to randomization that is not controlled by medication or via ablation.
5. Major adverse cardiovascular event within 3 months prior to randomization.



6. Uncontrolled severe hypertension: systolic blood pressure >180 mmHg or diastolic blood pressure >110 mmHg prior to randomization despite anti-hypertensive therapy.
7. Active liver disease defined as any known current infectious, neoplastic, or metabolic pathology of the liver or unexplained elevations in ALT, aspartate aminotransferase (AST), >3x the ULN, or total bilirubin >2x ULN at screening confirmed by a repeat abnormal measurement at least 1 week apart.
8. Severe concomitant non-cardiovascular disease that carries the risk of reducing life expectancy to less than 2 years.
9. History of malignancy that required surgery (excluding local and wide-local excision), radiation therapy and/or systemic therapy during the three years prior to randomization.
10. Females who are pregnant or nursing, or who are of childbearing potential and unwilling to use at least two methods of highly effective contraception (failure rate less than 1% per year) (e.g. combined oral contraceptives, barrier methods, approved contraceptive implant, long-term injectable contraception, or intrauterine device) for the entire duration of the study. Exemptions from this criterion:
  - a. Women >2 years postmenopausal (defined as 1 year or longer since last menstrual period) AND more than 55 years of age.
  - b. Postmenopausal women (as defined above) and less than 55 years of age with a negative pregnancy test within 24 hours of randomization.
  - c. Women who are surgically sterilized at least 3 months prior to enrollment.
11. Males who are unwilling to use an acceptable method of birth control during the entire study period (i.e. condom with spermicide).
12. Known history of alcohol and/or drug abuse within the last 5 years.
13. Treatment with other investigational products or devices within 30 days or five half-lives of the screening visit, whichever is longer.
14. Planned use of other investigational products or devices during the course of the study.
15. Any condition that according to the investigator could interfere with the conduct of the study, such as but not limited to:
  - d. Subjects who are unable to communicate or to cooperate with the investigator.
  - e. Unable to understand the protocol requirements, instructions and study-related restrictions, the nature, scope, and possible consequences of the study (including subjects whose cooperation is doubtful due to drug abuse or alcohol dependency).
  - f. Unlikely to comply with the protocol requirements, instructions, and study-related restrictions (e.g. uncooperative attitude, inability to return for follow-up visits, and improbability of completing the study).
  - g. Have any medical or surgical condition, which in the opinion of the investigator would put the subject at increased risk from participating in the study.
  - h. Persons directly involved in the conduct of the study.
16. Treatment (within 90 days of screening) with monoclonal antibodies directed towards PCSK9.

Subjects excluded for any of the above reasons may not be re-screened for participation at any time even if the exclusion characteristic has changed.

### 4.3 APPENDIX A: SIMON BROOME DIAGNOSTIC CRITERIA FOR FAMILIAL HYPERCHOLESTEROLEMIA

#### **Definite Familial Hypercholesterolemia:**

Required laboratory = high cholesterol levels:

- Adult = Total cholesterol levels >290 mg/dL (7.5 mmol/L) or LDL-C >190 mg/dL(4.9 mmol/L)
- Child less than 16 years of age = Total cholesterol levels >260 mg/dL (6.7 mmol/L) or LDL-C >155 mg/dL (4.0 mmol/L)

*Plus at least one of the two:*

- 1) Plus physical finding = tendon xanthomas, or tendon xanthomas in first or second degree relative

OR

- 2) DNA-based evidence of an LDL-receptor mutation, familial defective apo B-100, or a PCSK9 mutation

#### **Possible Familial Hypercholesterolemia:**

**Laboratory – high cholesterol levels:**

- Adult = Total cholesterol levels > 290 mg/dL (7.5 mmol/L) or LDL-C > 190 mg/dL (4.9 mmol/L)
- Child less than 16 years of age = Total cholesterol levels > 260 mg/dL (6.7 mmol/L) or LDL-C > 155 mg/dL (4.0 mmol/L)

*Plus at least one of the two:*

- 1) Family history of at least one of the following.
  - a. Family history of myocardial infarction at:
    - i. Age 60 years or younger in first-degree relative
    - ii. Age 50 years or younger in second-degree relative

OR

- 2) Family history of elevated total cholesterol
  - a. Greater than 290 mg/dL (7.5 mmol/L) in adult first- or second-degree relative
  - b. Greater than 260 mg/dL (6.7 mmol/L) in child, brother or sister aged younger than 16 years

*Reference: Austin MA, Hunter CM, Zimmern RL, Humphries SE. Genetic causes of monogenic heterozygous familial hypercholesterolemia: a HuGE prevalence review. American Journal of Epidemiology 2004;160:407-420.*

#### **4.4 APPENDIX B: REQUIREMENTS FOR BACKGROUND LIPID LOWERING TREATMENT**

There should be no plans at the time of screening and randomization to modify the dose of statin or other lipid lowering medication such as ezetimibe for the duration of the trial. Unless the background lipid lowering treatment exceptions described below are met, subjects must have been treated with one of the following highly effective statins at the specified daily doses and at a stable dose, preferably for 6 weeks but for at least 30 days, prior to screening for the study:

1. atorvastatin, 40 or 80 milligrams (mg) once a day;
2. rosuvastatin, 20 or 40 mg, once a day;
3. simvastatin 40 mg, once a day or, if a subject has been on that dose for >1 year, 80 mg once a day.

Combination medications that contain atorvastatin, rosuvastatin, or simvastatin components described at the aforementioned doses will be permitted.

#### **4.5 Background lipid lowering treatment exceptions**

The following background lipid lowering treatment exceptions are permitted:

1. Lower doses of statins due to partial statin intolerance:

Subjects may be on a lower dose of one of the highly effective statins described above if there is documented intolerance to any one of them (atorvastatin, rosuvastatin, or simvastatin) at the aforementioned doses. Intolerance to any dose of any statin must be documented as historical adverse events attributed to the statin in question, in the source documentation and electronic case report form (eCRF).

2. Regulatory limitations:

Subjects may be on a lower dose of one of the highly effective statins described above if the highest locally approved dose for one of the stated statins is lower than those doses shown above (e.g., in some countries, atorvastatin 20 mg, once a day, is the highest locally approved dose).

3. Alternative statins:

Subjects may be treated with other statins (pravastatin, fluvastatin, pitavastatin, or lovastatin), different from the highly effective statins listed above, if there is documented intolerance to any two different highly effective statins (atorvastatin, rosuvastatin, simvastatin) at the lowest available daily dose for at least one of those highly effective statins. Intolerance to any statin must be documented as historical adverse events attributed to the statin in question, in the source documentation and eCRF.

#### 4. No background statin therapy:

Subjects may be enrolled who are only on non-statin lipid lowering therapy, if complete statin intolerance has been documented. Subjects with complete statin intolerance must be unable to tolerate at least two statins: one statin at the lowest available daily dose AND another statin at any dose. Intolerance to any statin must be documented as historical adverse events attributed to the statin in question, in the source documentation and eCRF. The sole exception, for which a subject may participate in the study with documentation of intolerance to only one statin, is a documented history of rhabdomyolysis attributed to that statin.

### 4.6 Baseline Statin Dose Categories

| High-intensity Statins  | Moderate-intensity Statins    | Low-intensity Statins* |
|-------------------------|-------------------------------|------------------------|
| Atorvastatin 40 – 80 mg | Atorvastatin 10 – 20 mg       | Simvastatin 10 mg      |
| Rosuvastatin 20 – 40 mg | Rosuvastatin 5 – 10 mg        | Pravastatin 10 – 20 mg |
| Simvastatin 80mg        | Simvastatin 20 – 40 mg        | Lovastatin 20 mg       |
|                         | Pravastatin 40 – 80 mg        | Fluvastatin 20 – 40 mg |
|                         | Lovastatin 40 mg              | Pitavastatin 1 mg      |
|                         | Fluvastatin XL 80 mg          |                        |
|                         | Fluvastatin 40 mg twice daily |                        |
|                         | Pitavastatin 2 – 4 mg         |                        |

\*Low-intensity statins also include those patients taking low-dose statins using an alternate regimen (i.e., every other day or for a specified number of times per week).

### 4.7 Endpoints of the Study and Randomization Strata

#### Endpoints

4.4.1. The primary endpoints of this study were:

- Percentage change in LDL-C from baseline to Day 510
- Time adjusted percentage change in LDL-C from baseline after Day 90 and up to Day 540. This is the average percentage change in LDL-C from baseline over the period after Day 90 and up to Day 540.

4.4.2 The key secondary endpoints of this study were:

- Absolute change in LDL-C from baseline to Day 510
- Time adjusted absolute change in LDL-C from baseline after Day 90 and up to Day 540
- Percentage change from baseline to Day 510 in PCSK9, total cholesterol, ApoB, and non-HDL-C

The other secondary endpoints of this study were:

- Maximum percentage change in LDL-C
- Absolute change from baseline to Day 510 in PCSK9, total cholesterol, ApoB and non-HDL-C
- Absolute change and percentage change in LDL-C from baseline to each assessment time up to Day 540

- Individual responsiveness defined as the number of subjects reaching on treatment LDL-C levels of <25 mg/dL, <50 mg/dL, <70 mg/dL, and <100 mg/dL at Day 510
- Proportion of subjects in each group with greater or equal to 50% LDL-C reduction from baseline
- Absolute change and percentage change in other lipids, lipoproteins, apolipoproteins, and PCSK9 from baseline at each subsequent visit to Day 540
- Proportion of subjects in each group who attain global lipid targets for their level of ASCVD risk
- Safety and tolerability profile of inclisiran as measured by AEs, SAEs, vital signs, clinical laboratory values, ECG measurements and formation of ADA and subsequent characterization of ADA

4.4.3. The exploratory endpoints of this study were:

- Incidence of CV death, resuscitated cardiac arrest, non-fatal MI, and non-fatal stroke (ischemic and hemorrhagic)
- Proportion of subjects in each group with any LDL-C reduction from baseline at any visit (responders).
- Response of LDL-C reduction by underlying causal mutations of HeFH

Treatment allocation was stratified by country and by current use of statins or other lipid-modifying therapies.

## **4.8 Clinical End Point Adjudication**

No formal clinical endpoint adjudication was performed in this study.

## **4.9 Laboratory Analytical Methods**

All analyses were performed by Medpace Reference laboratories (MRL) who are certified in the CDC-NHLBI Lipid Standardization Part III Program.

PCSK9 analysis was performed using Quantikine ELISA from R&D Systems according to the manufacturer's instructions using a Tecan Sunrise reader and EDTA-plasma. Intra- and inter-assay coefficients of variation were observed to be 4.7% and 5.4%. Completed subject sets were analyzed on the same plate to eliminate inter-assay variability when comparing results within a subject.

LDL cholesterol was determined by both the Friedewald formula, and additionally by preparative ultracentrifugation (PUC). LDL cholesterol methods remained the same throughout the trial, including both calibration and reagent systems. MRL does not change methods during the course of a study.

Analytical methods (includes all methods required to derive LDL cholesterol by Friedewald and PUC)

Analysis of total cholesterol (TC) and triglycerides (TG) were by enzymatic methods on a Beckman Coulter AU Series automatic analyzer with in-house developed serum calibrators directly traceable to CDC-NHLBI reference procedures. (Ref: Myers GL, Cooper GR, et al. The

Centers for Disease Control-National Heart, Lung and Blood Institute Lipid Standardization Program. An approach to accurate and precise lipid measurements. Clin Lab Med 1989;9:105-35).

HDL cholesterol was performed by precipitation with 50 kDa dextran sulfate with magnesium ions ( $MgCl_2$ ), followed by analysis of the supernatant for cholesterol by enzymatic methods on a Beckman Coulter AU Series automatic analyzer with in-house developed serum calibrators directly traceable to CDC-NHLBI reference procedures (same methodology as TC).

PUC was performed using the method outlined in the Lipid Research Clinics methods manual. (Ref: US Department of Health and Human Services. Manual of laboratory operations: lipid and lipoprotein analysis (revised). Washington, DC: US Government Printing Office; 1982. Report No.: (NIH) 75-67815).

Serum or plasma was overlaid with normal saline (density 1.006 g/mL) and centrifuged (Beckman Ultracentrifuge Model # L-90K and rotor, Type 50.4) at 40,000 rpm for 18–22 hours at 10°C to separate very low-density lipoprotein (VLDL) in the supernatant ('top' fraction) from LDL and HDL in the infranatant or 'bottom' fraction. The cholesterol concentration of the infranatant was measured. All apolipoprotein B-containing lipoproteins, VLDL, LDL and Lp(a), were precipitated from serum using 50 kDa dextran sulfate with magnesium ions ( $MgCl_2$ ), and the cholesterol in the remaining HDL fraction was measured. The HDL cholesterol concentration was subtracted from the infranatant cholesterol to provide the PUC LDL cholesterol value.

Calculated LDL cholesterol was derived from the Friedewald formula where:

$LDL\ cholesterol = TC - (HDL\ cholesterol + TG/5)$

[for mmol/L,  $LDL\ cholesterol = TC - HDL\ cholesterol - (TG/2.2)$ ].

Lp(a): MRL uses an automated monoclonal antibody immunoturbidometric "isoform-independent" method, meaning independent of Lp(a) particle size. The calibrators for this kit are referenced against WHO SRM 2B. Since there is significant heterogeneity in Lp(a) particles, the assay used should be insensitive to the size of apo(a)—the protein bound to apo B-100. Results are reported in nmol/L of Lp(a) protein, rather than mass units, due to the varying mass ratio of apo(a) to apoB in different sized Lp(a) particles. The Polymedco Lp(a) method in use at MRL is analyzed on a Beckman Coulter AU Series analyzer, and is referenced to an International Reference Material (SRM 2B) developed by the International Federation of Clinical Chemistry (IFCC), and approved by National Heart, Lung, and Blood Institute (NHLBI). This allows accurate measurement of Lp(a) levels irrespective of isoform size.

Apolipoproteins B were measured using nephelometric methodology on a Siemens BNII analyzer.

#### 4.10 Genetic analysis

Genomic DNA was extracted from mononucleated cells using the QIAamp DNA Blood Mini Kit (Qiagen). Library preparation was done using the KAPA Library Preparation Kits (Roche). The kit provides all of the enzymes and reaction buffers required for constructing fragmented libraries for NGS and include the following modules: End Repair, A-Tailing, Ligation, and Amplification for Illumina platforms. Libraries were sequenced on the Illumina MiSeq platform using the MiSeq Reagent Kit v2 which offers improved chemistry to increase cluster density, decrease cycle time, and improve quality (Q) scores. The achieved depth of coverage was at least 500x. The assay detected substitutions and insertions/deletions (indels) in exons and intron-exon boundaries of the four targeted genes. Probe design for the FH panel was achieved using the Roche Nimble Design tool. The assay detected substitutions and insertions/deletions (indels) in exons and intron-exon boundaries of the following genes: LDLR (18 exons), ApoB (regions of exons 26 and 29 involved in LDLR binding), PCSK9 (12 exons) and LDLRAP1 (9 exons). The software allows coverage of about 200 bp of the intron-exon boundaries and full 3'UTR and 5'UTR sequences were covered. Genetic analysis was performed at Medpace Research Laboratories. In silico analysis of missense mutations was performed using VarSeq software which employs PolyPhen-2 HumDiv and Hum Var (<http://genetics.bwh.harvard.edu/pph2/>), SIFT Human Protein (<http://sift.jcvi.org/>) and Mutation Taster ([www.mutationtaster.org](http://www.mutationtaster.org)) to determine pathogenicity status (Pathogenic, Likely Pathogenic, or Uncertain Significance). Variants identified were compared to the GRCh37/hg19 reference genome. The pathogenicity of reported variants were determined according to current guidelines<sup>1</sup>.

Mi-seq generated FASTQ files were transferred to the local server and analyzed with a customized automated bioinformatics pipeline using CLC genomics workbench 12.0.3 (QIAGEN, Aarhus, Denmark) which has been demonstrated in successfully identifying germline variants in targeted sequencing panels<sup>2</sup>. Briefly, sequencing reads from FASTQ file were first imported and aligned to the full human genome GRCh37/hg19 build. The duplicate PCR reads were then removed and local alignment was performed for aligned reads to further improve indel detection. Variant calling was then performed with the built-in "Fixed Ploidy Variant Detection" module. Target summary statistics were also generated for each region and exported. The resulting BAM file and VCF file were exported for further downstream analysis. All protocols were performed with default parameter setting.

To further identify variants with clinical significance to FH, a customized filter process was applied to VCF file using VarSeq v2.1.1 (Golden Helix). Variants were removed based on the following criteria:

1. Read depth and quality of the variant was less than 30.
2. Allele frequency of the variant was larger than 1% in any one of the public database: ExAC, the National Heart, Lung, and Blood Institute Exome Sequencing Project (ESP) and 1000 Genome Project Phase 3 (1kG).
3. The sequence ontology of the variant did not demonstrate clinical relevance of the mutation (e.g. "intro\_variant", "5\_prime\_UTR\_variant" etc).
4. The PHRED score from CADD v1.4 was less than 10.

5. NOT predicted as “Damaging” or “Probably Damaging” by ALL three variant functional prediction software: SIFT, PolyPhen2 and MutationTaster.

The read depth was at least 500x and a minimum of 200 bp of the intron-exon boundaries was covered as well as full 3’UTR and 5’UTR regions. The detected mutations were Sanger sequenced when detected for the first time. The pathogenicity of reported variants were determined according to current guidelines<sup>2</sup>

CNV calling was done using the VarSeq v2.1.1 CNV caller (VS-CNV) which has succeeded in identifying true CNV regions from targeted sequencing NGS data similar to this study design<sup>3</sup>. The algorithm used by VS-CNV is briefly described here. The VS-CNV algorithm first built a normalized coverage profile from a batch of reference samples adjusted with GC-content of target region and sample coverage. Then the target regions of a test sample were compared with the profile and a coverage ratio and corresponding Z-score were computed for each target region. The coverage ratio was calculated as the test sample coverage divided by the mean reference sample coverage in the target region. A higher ratio value suggests a potential duplication event and a lower one would indicate heterozygous/homozygous deletion. The Z-score measured the number of standard deviations that the observed ratio deviated from the mean reference coverage distribution. A p-value was calculated which measured the probability of observing this Z-score if the test sample is normal. Finally, segmentation analysis merged multiple affected target regions into contiguous CNV events. In this study, a total of 23 normal samples were used to build reference sample coverage profile. A CNV was called and retained when the p-value was less than 0.01 and no QC flag of “Within Regional IQR” existed for the CNV which suggested a noisy read coverage region. A moderate coverage ratio between 0.8 and 1.2 was further manually reviewed by examining across all samples to determine if it was an artefact. For the purposes of the study, only CNVs detected in LDLR were considered.

## References

1. Richards S, et al. Standards and guidelines for the interpretation of sequence variants: a joint consensus recommendation of the American College of Medical Genetics and Genomics and the Association for Molecular Pathology. *Genet Med*. 2015; 17(5): 405-24.2. Johansen CT, Dubé JB, Loyzer MN, MacDonald A, Carter DE, McIntyre AD, Cao H, Wang J, Robinson JF, Hegele RA. LipidSeq: a next-generation clinical resequencing panel for monogenic dyslipidemias. *Journal of Lipid Research*. 2014 Apr 1;55(4):765-72.
3. Iacocca MA, Wang J, Dron JS, Robinson JF, McIntyre AD, Cao H, Hegele RA. Use of next-generation sequencing to detect LDLR gene copy number variation in familial hypercholesterolemia. *Journal of Lipid Research*. 2017;58(11):2202-9.

## 4.11 Sample Size

The sample size calculation was performed with the assumption (which was based on the observed results from a Phase II study) that the difference in change from baseline between the active dose group and the placebo group for LDL-C will be no less than 30 mg/dL, with a standard deviation of 20 mg/dL.

Assuming about a 5% drop out rate, the sample size will be approximately 380 subjects that are evaluable for efficacy across the placebo and inclisiran dose groups. This sample size of at least 380 evaluable subjects, will provide more than 90% power to detect a 30% reduction of



LDL-C levels in the inclisiran group compared to the placebo group at a two-sided significance level of 0.05. This sample size will also contribute additional sufficient safety data.

#### 4.12 Statistical Analyses – Efficacy End Points

The co-primary efficacy endpoints were tested sequentially both at the 0.05 level (both are two-sided tests). If both were significant the key secondary efficacy endpoints were then tested.

*The family-wise type I error rate was controlled at a two-sided significance level of  $\alpha=0.05$  by using a nested testing procedure. The percentage change in LDL-C from baseline to Day 510 was tested first. If the null hypothesis was rejected at a two-sided significance level of  $\alpha=0.05$  and superiority of inclisiran over placebo was claimed, then the time adjusted percentage change in LDL-C from baseline after Day 90 and up to Day 540 was tested, also at a two-sided significance level of  $\alpha=0.05$ .*

The Hochberg procedure was applied to control the family-wise type I error rate at a two-sided significance level of  $\alpha=0.05$  for the key secondary endpoints. There were 6 key secondary endpoints –listed below. As both co-primary endpoints were below 0.05, we used the Hochberg procedure with the lowest alpha of  $0.05/6 = 0.0083$ . All p-values for the key secondary endpoints were lower than this.

*The key secondary endpoints of this study were:*

- *Absolute change in LDL-C from baseline to Day 510.*
- *Time adjusted absolute change in LDL-C from baseline after Day 90 and up to Day 540.*
- *Percentage change from baseline to Day 510 in PCSK9, total cholesterol, ApoB, and non-HDL-C.*

A number of analysis techniques were utilized to assess the efficacy of inclisiran in this study. Treatments were compared utilizing two sample t-tests, analysis of covariance models (ANCOVA), and mixed models for repeated measures (MMRM). Observed cases and imputed data using multiple imputation techniques were utilized in the analyses. Two different multiple imputation techniques were utilized to explore the possibility that missing data were missing not at random (MNAR). The first was a control-based pattern mixture model (CB-PMM) (Ratitch and O’Kelly (2011) and the second was a washout model which is a variation of the CB-PMM. For each multiple imputation technique 100 imputed datasets were created with analysis results combined using Rubin’s method (Rubin, 1987). Refer to full Statistical Analysis Plan available at NEJM.

## 5. Supplementary Figures

Figure S1. Study Design

Randomized 1:1 inclisiran 300 mg vs. placebo – with maximally tolerated statins

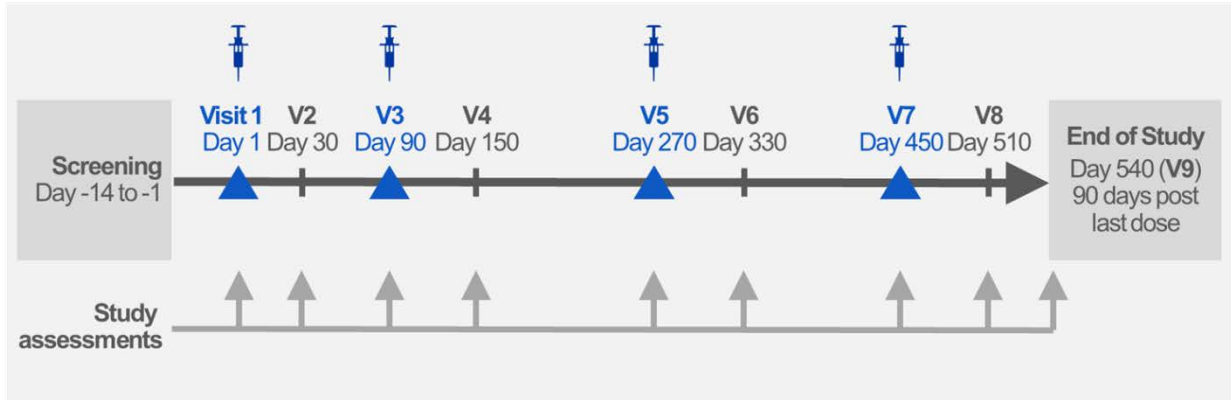

Figure S2. Patient Disposition (Consort Diagram)

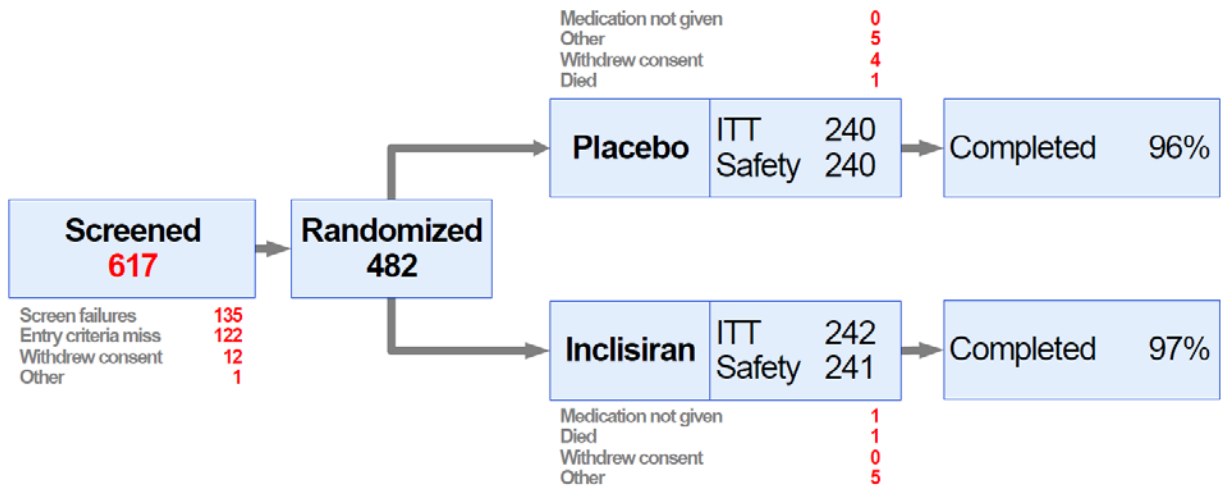

Figure S3. Waterfall plots for individual patient changes in LDL-C and PCSK9 (percentage and absolute, ITT population). As panels A,B,C and D

A. Waterfall Plot of Percentage Change in LDL-C from Baseline to Day 510

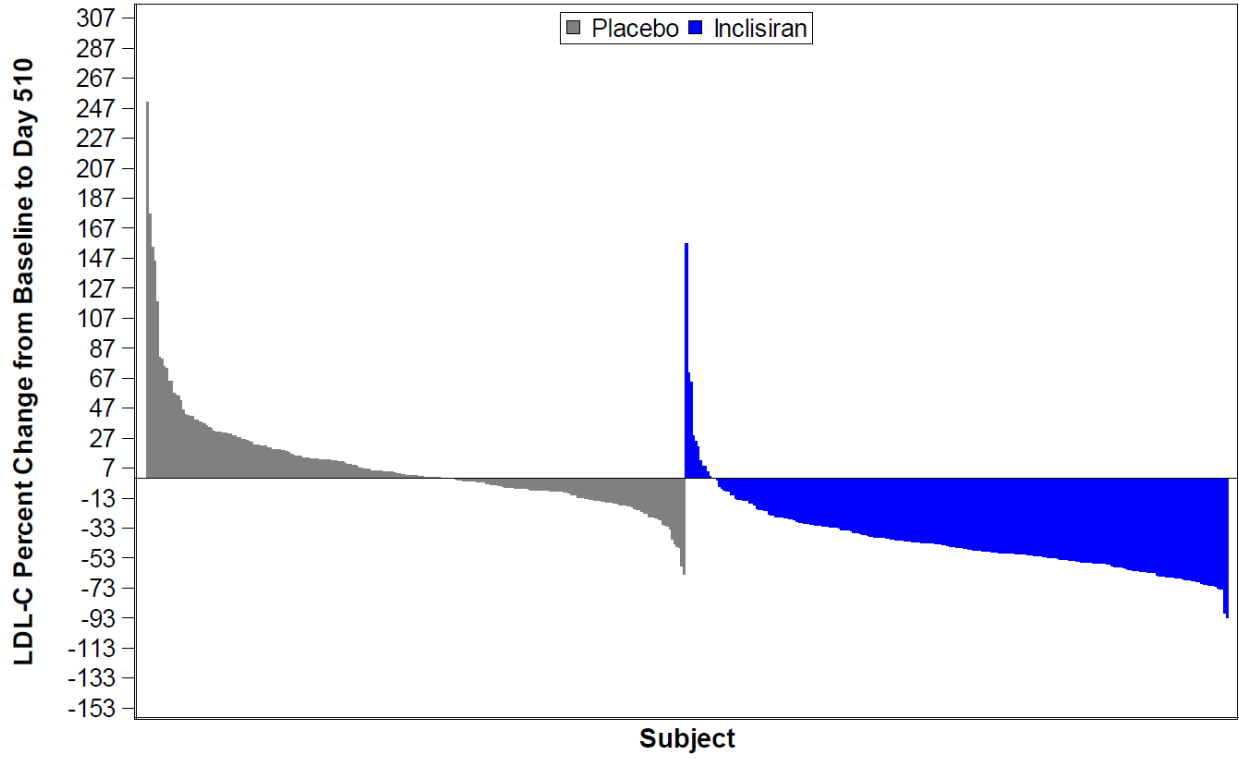

B. Waterfall Plot of Absolute Change in LDL-C from Baseline to Day 510

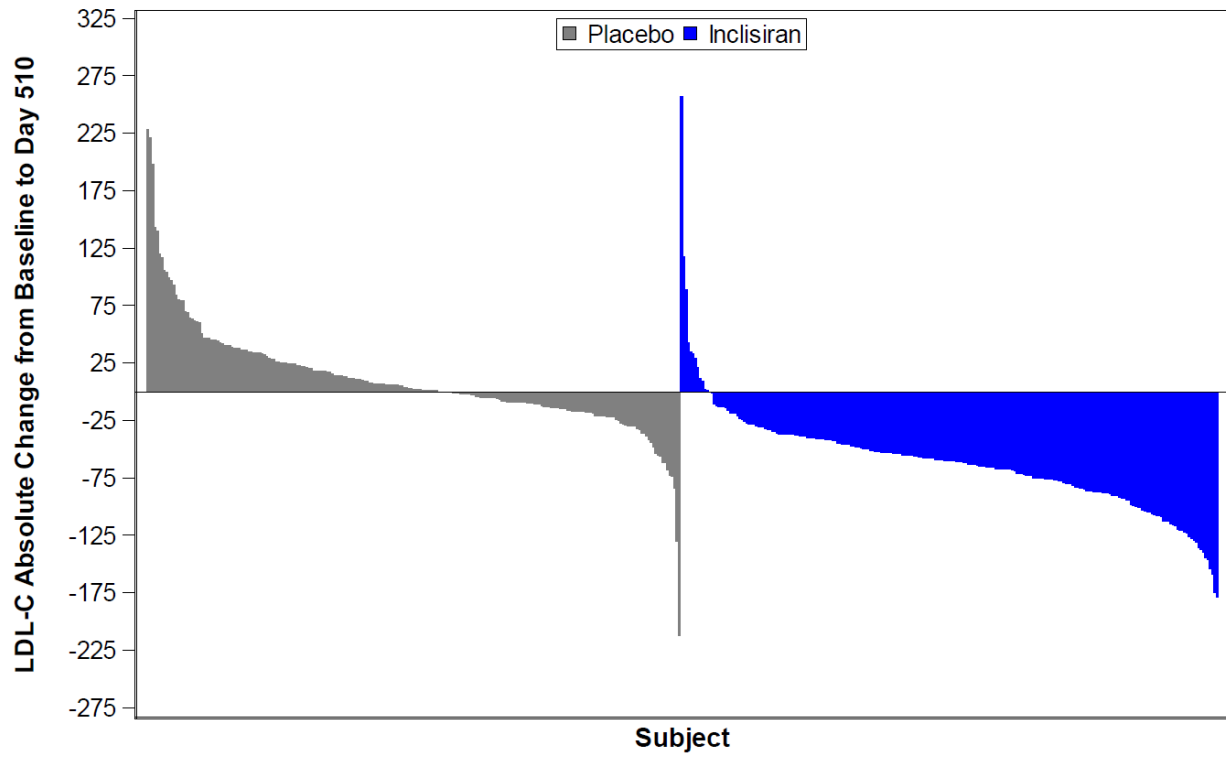

C. Waterfall Plot of Percentage Change in PCSK9 from Baseline to Day 510

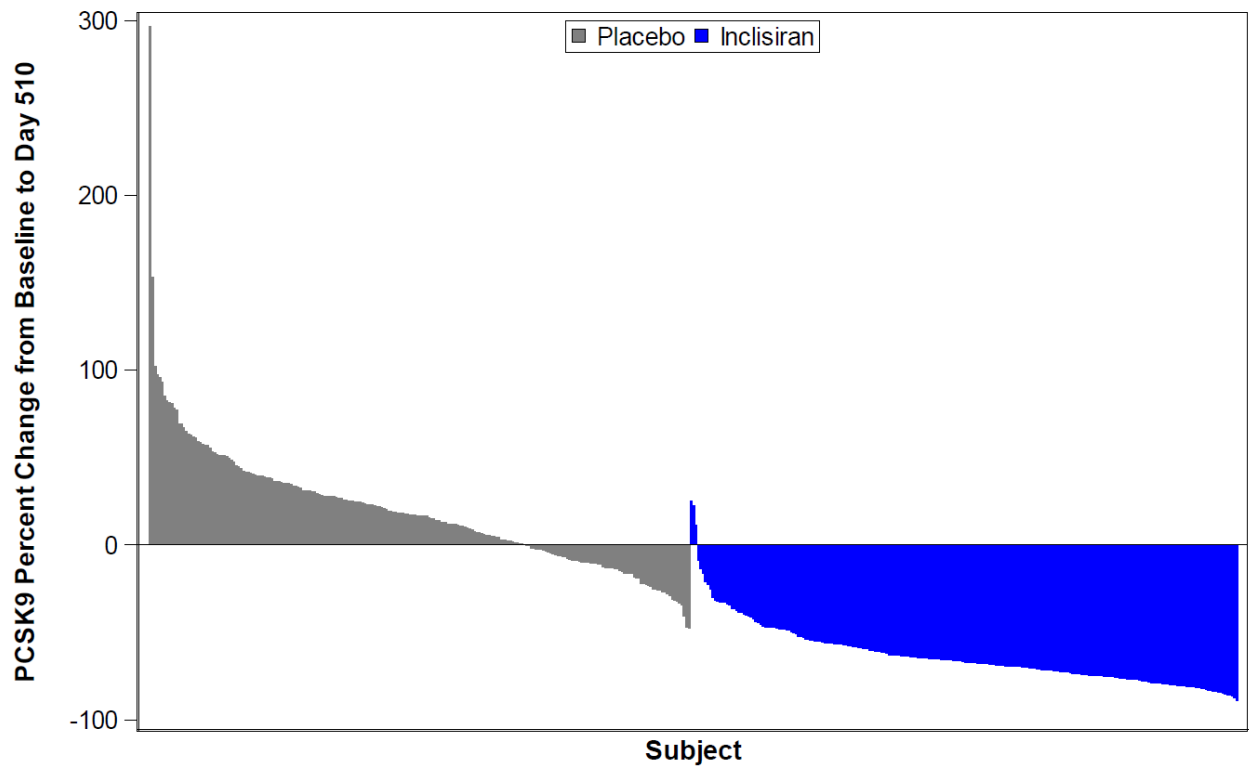

D. Waterfall Plot of Absolute Change in PCSK9 from Baseline to Day 510

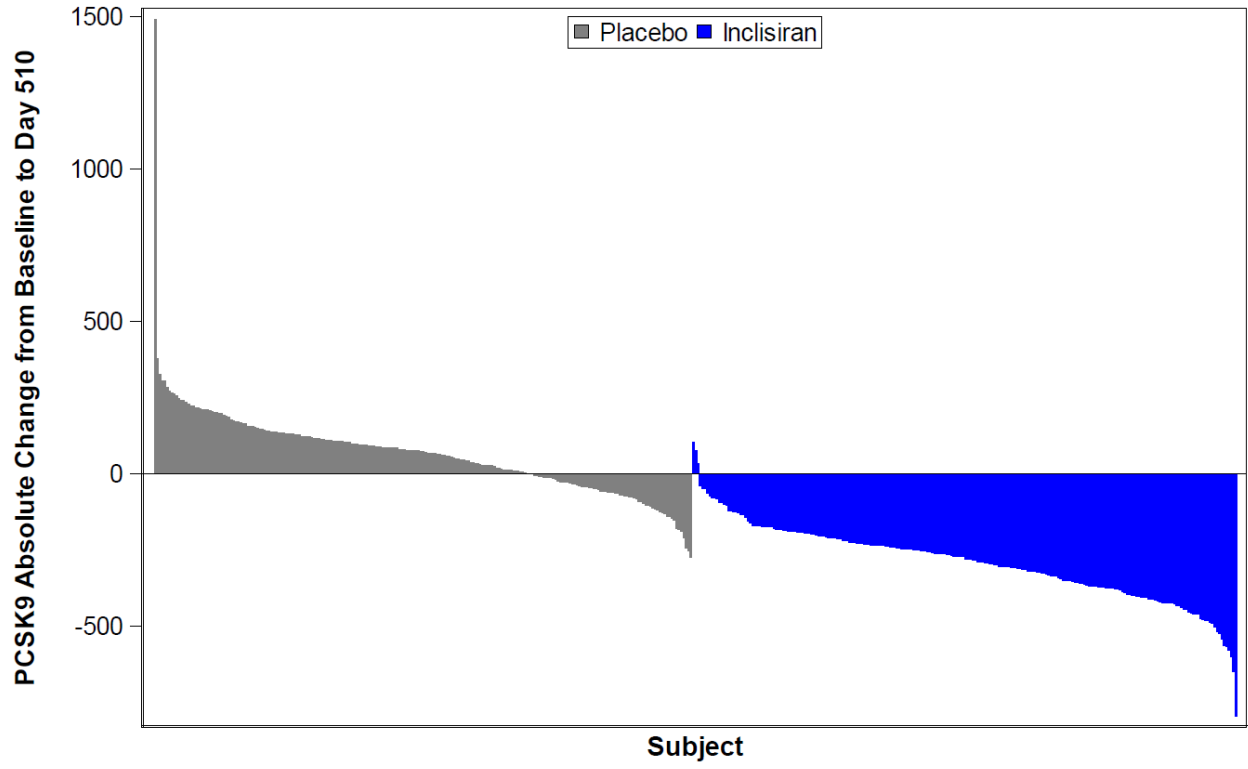

Figure S4. Placebo adjusted mean percent change in LDL-cholesterol from baseline according to FH genotype

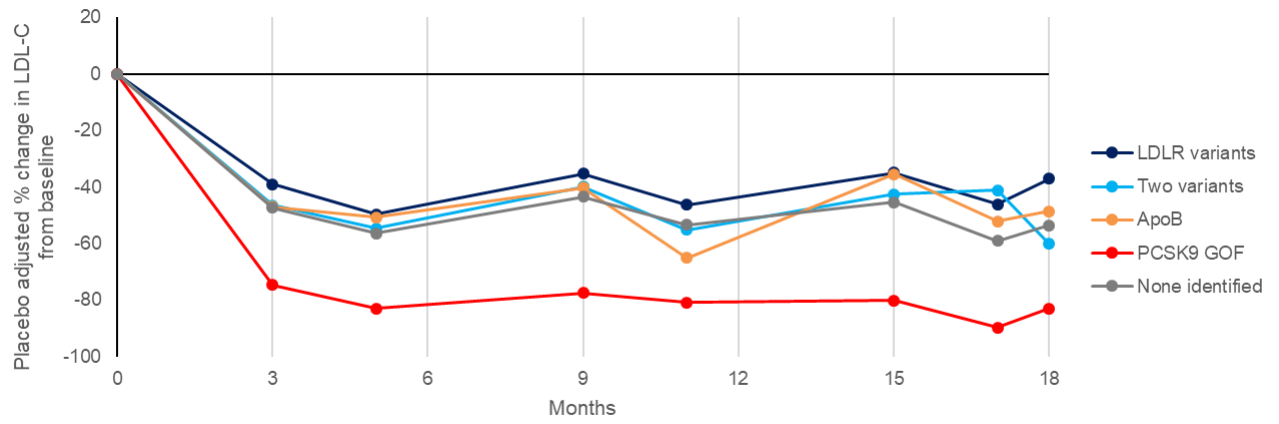

## 6. Supplementary Tables

**Table S1. Sensitivity Analysis of the Co-Primary Endpoints Using Imputation for Missing Data (ITT Population)\***

| Endpoint                                                                                    | Observed | Washout | MMRM   | PMM    |
|---------------------------------------------------------------------------------------------|----------|---------|--------|--------|
| Placebo adjusted percent change from baseline in LDL-C at Day 510                           | -49.5%   | -47.9%  | -48.8% | -48.0% |
| Placebo adjusted time averaged percent change from baseline in LDL-C from Day 90 to Day 540 | -44.9%   | N/A     | -44.8% | -44.3% |

\*P< 0.001 for placebo corrected reductions in LDL cholesterol from baseline with inclisiran

MMRM, mixed model repeat measures; PMM, pattern mixture model

**Table S2. Proportion of patients achieving LDL cholesterol goals at Day 510\* (ITT Population)**

| Patients Achieving LDL Cholesterol Goals at Day 510 (ITT Population). |                 |                    |
|-----------------------------------------------------------------------|-----------------|--------------------|
|                                                                       | Patients, n (%) |                    |
| LDL-C target level                                                    | Placebo (n=240) | Inclisiran (N=242) |
| <25 mg/dL                                                             | 0               | 2 (0.8)            |
| <50 mg/dL                                                             | 2 (0.8)         | 46 (19.0)          |
| <70 mg/dL                                                             | 3 (1.3)         | 99 (40.9)          |
| <100mg/dL                                                             | 21 (8.8)        | 158 (65.3)         |
| >100 mg/dL                                                            | 208 (86.7)      | 73 (30.2)          |
| Missing                                                               | 11 (4.6)        | 11 (4.5)           |

\*subjects can be presented in more than 1 category



**Table S3. Changes in Lipid Parameters at Day 510 (observed, ITT population)**

| Parameter               | Placebo<br>(n=240) | Inclisiran<br>(n=242) | Placebo<br>adjusted |
|-------------------------|--------------------|-----------------------|---------------------|
| LDL-C                   | +8.4%              | -41.1%                | -49.5%              |
| Total cholesterol       | +6.8%              | -26.1%                | -32.9%              |
| ApoB                    | +2.9%              | -34.0%                | -36.9%              |
| Non-HDL-cholesterol     | +7.5%              | -36.1%                | -43.6%              |
| Triglyceride (median)   | -0.7%              | -11.1%                | -11.8%              |
| Lp(a)* (median)         | +3.7%              | -13.5%                | -17.2%              |
| HDL-C                   | +6.0%              | +8.6%                 | +2.6%               |
| hsCRP mg/L<br>(median)* | +4.0               | 0.0                   | 4.0                 |

\*Day 540 sampling time point

**Table S4. Reduction in serum PCSK9 according to FH genotype and in those subjects in whom no FH causative mutation could be found**

| Variant                                              | Baseline<br>PCSK9<br>µg/L | Percent change in PCSK9 from<br>baseline (%) |                    |                                   | Absolute change in PCSK9 from<br>baseline (µg/L) |                      |                                   |
|------------------------------------------------------|---------------------------|----------------------------------------------|--------------------|-----------------------------------|--------------------------------------------------|----------------------|-----------------------------------|
|                                                      |                           | Inclisiran                                   | Placebo            | Placebo<br>adjusted<br>difference | Inclisiran                                       | Placebo              | Placebo<br>adjusted<br>difference |
| <b>Two<br/>variants<br/>(double)</b><br>P=15<br>I=22 | 495.2<br>(447;544)        | -60.0<br>(-70;-50)                           | +30.5<br>(-16;+77) | -90.6<br>(-127;-54)               | -322.2<br>(-400;-244)                            | +135.0<br>(-98;+368) | -457.2<br>(-655;-<br>259)         |
| <b>LDLR total</b><br>P=131<br>I=125                  | 454.2<br>(438;470)        | -59.0<br>(-62;-56)                           | +21.3<br>(+16;+27) | -80.2<br>(-87;-74)                | -282.1<br>(-304;-260)                            | +76.1<br>(+57;+96)   | -358.2<br>(-387;-329)             |
| <b>LDLR<br/>Pathogenic</b><br>P=118<br>I=113         | 457.9<br>(441;475)        | -59.3<br>(-63;-60)                           | +22.6<br>(+17;+28) | -82.0<br>(-89;-75)                | -288.1<br>(-311;-265)                            | +81.5<br>(+61;+102)  | -369.5<br>(-401;-339)             |
| <b>Likely<br/>pathogenic</b><br>P=9<br>I=8           | 430.1<br>(363;497)        | -52.7<br>(-70;-36)                           | +7.2<br>(-12;+26)  | -59.8<br>(-84;-36)                | -204.9<br>(-300;-110)                            | +20.3<br>(-46;+86)   | -225.2<br>(-326;-124)             |
| <b>LDLR</b>                                          |                           |                                              |                    |                                   |                                                  |                      |                                   |

|                                                        |                    |                    |                   |                     |                       |                      |                       |
|--------------------------------------------------------|--------------------|--------------------|-------------------|---------------------|-----------------------|----------------------|-----------------------|
| <b>variant of uncertain significance</b><br>P=4<br>I=4 | 400.6<br>(318;484) | -61.9<br>(-85;-39) | +14.1<br>(-27;55) | -76.1<br>(-117;-35) | -253.4<br>(-372;-134) | +48.8<br>(-100;+197) | -302.1<br>(-456;-148) |
| <b>APOB</b><br>P=11<br>I=12                            | 418.4<br>(369;468) | -63.9<br>(-69;-59) | +8.2<br>(-17;+33) | -72.1<br>(-95;-49)  | -272.2<br>(-337;-207) | +8.5<br>(-75;+91)    | -280.6<br>(-379;-183) |
| <b>PCSK9 GOF</b><br>P=0<br>I=1                         | 286.5<br>(287;287) | -80.4              | n/a               | n/a                 | -230.3<br>(-230;-230) | n/a                  | n/a<br>n/a            |
| <b>None</b><br>P=54<br>I=61                            | 406.7<br>(382;432) | -69.9<br>(-74;-65) | +18.4<br>(+9;+28) | -88.3<br>(-98;-79)  | -302.2<br>(-336;-268) | +50.3<br>(+17;+84)   | -352.4<br>(-400;-305) |
| <b>No genetic testing</b><br>P=29<br>I=21              | 422.8<br>(387;458) | -66.8<br>(-73;-61) | +5.9<br>(-5;+17)  | -72.7<br>(-86;-60)  | -285.7<br>(-331;-241) | +7.3<br>(-38;+53)    | -293.0<br>(-356;-230) |

LDLR low density lipoprotein receptor, APOB apolipoprotein B, PCSK9 GOF PCSK9 gain of function variant, P placebo, I inclisiran

**Table S5. Most common treatment emergent adverse events (Safety population)**

| <b>Preferred Term</b>             | <b>Placebo<br/>n = 240<br/>(50%)</b> | <b>Inclisiran<br/>n = 241<br/>(50%)</b> | <b>Total<br/>n = 481<br/>(100%)</b> |
|-----------------------------------|--------------------------------------|-----------------------------------------|-------------------------------------|
| Subjects with at least one TEAE*  | 172 (71.7)                           | 185 (76.9)                              | 357 (74.2)                          |
| Nasopharyngitis                   | 20 (8.3)                             | 28 (11.6)                               | 48 (10.0)                           |
| Influenza                         | 21 (8.8)                             | 13 (5.4)                                | 34 (7.1)                            |
| Upper respiratory tract infection | 16 (6.7)                             | 16 (6.6)                                | 32 (6.7)                            |
| Back pain                         | 10 (4.2)                             | 17 (7.1)                                | 27 (5.6)                            |
| Injection site reactions          | 0                                    | 22 (9.1)                                | 22 (4.6)                            |
| Gastroenteritis                   | 6 (2.5)                              | 11 (4.6)                                | 17 (3.5)                            |
| Hypertension                      | 8 (3.3)                              | 9 (3.7)                                 | 17 (3.5)                            |
| arthralgia                        | 7 (2.9)                              | 9 (3.7)                                 | 16 (3.3)                            |
| Urinary tract infection           | 7 (2.9)                              | 9 (3.7)                                 | 16 (3.3)                            |

|                         |         |          |          |
|-------------------------|---------|----------|----------|
| Diarrhea                | 5 (2.1) | 9 (3.7)  | 14 (2.9) |
| Cough                   | 2 (0.8) | 11 (4.6) | 13 (2.7) |
| Bronchitis              | 4 (1.7) | 9 (3.7)  | 13 (2.7) |
| Myalgia                 | 8 (3.3) | 5 (2.1)  | 13 (2.7) |
| Muscle spasms           | 5 (2.1) | 7 (2.9)  | 12 (2.5) |
| Headache                | 6 (2.5) | 6 (2.5)  | 12 (2.5) |
| Dizziness               | 7 (2.9) | 4 (1.7)  | 11 (2.3) |
| Sinusitis               | 7 (2.9) | 4 (1.7)  | 11 (2.3) |
| Injection site erythema | 0       | 10 (4.1) | 10 (2.1) |
| tendonitis              | 4 (1.7) | 6 (2.5)  | 10 (2.1) |

\*Treatment emergent adverse events that occurred in  $\geq 2\%$  of patients in total
