# Supplementary material for: Inclisiran for the Treatment of Heterozygous Familial Hypercholesterolemia
Source: Atypon-hosted journal article supplement (doi:10.1056/nejmoa1913805), 2020-03-18
Supplement: nejmoa1913805_data-sharing.pdf [file nejmoa1913805_data-sharing.pdf]

## Data Sharing Statement

Raal FJ, Kallend D, Ray KK, et al. Inclisiran for the Treatment of Heterozygous Familial Hypercholesterolemia. N Engl J Med. DOI: 10.1056/NEJMoa1913805.

| Question                                                            | Authors' Response |
|---------------------------------------------------------------------|-------------------|
| Will the data collected for your study be made available to others? | No                |
| Would you like to offer context for your decision?                  | —                 |
| Which data?                                                         | —                 |
| Additional information about data                                   | —                 |
| How or where can the data be obtained?                              | —                 |
| When will data availability begin?                                  | —                 |
| When will data availability end?                                    | —                 |
| Will any supporting documents be available?                         | —                 |
| Which supporting documents?                                         | —                 |
| Additional information about supporting documents                   | —                 |
| How or where can supporting documents be obtained?                  | —                 |
| When will supporting documents availability begin?                  | —                 |
| When will supporting documents availability end?                    | —                 |
| To whom will data be available?                                     | —                 |
| For what type of analysis or purpose?                               | —                 |
| By what mechanism?                                                  | —                 |
| Any other restrictions?                                             | —                 |
| Additional information                                              | —                 |

This statement was posted on March 18, 2020, at NEJM.org.
